# Supplementary material for: The Identification of Host Proteins That Interact with Non-Structural Proteins-1α and -1β of Porcine Reproductive and Respiratory Syndrome Virus-1
Source: MDPI journal article supplement (doi:10.3390/v15122445), 2023-12-16
Supplement: s1 [file s1]

# The Identification of host proteins that interact with non-structural proteins -1 $\alpha$ and -1 $\beta$ of porcine reproductive and respiratory syndrome virus-1

Sofia Riccio, Kay Childs, Ben Jackson, Simon P. Graham, Julian Seago

## Supplementary Figures

A

| PAM + NSP1 | PAM + 53 | PAM + V |         |
|------------|----------|---------|---------|
|            |          |         |         |
|            |          |         | T + 53  |
|            |          |         |         |
|            |          |         |         |
|            |          |         | T + LAM |
|            |          |         |         |

B

DNAJA3

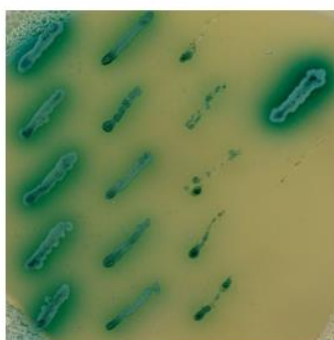

PIAS2

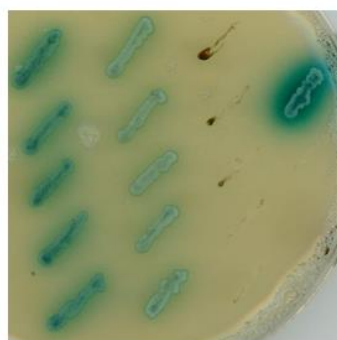

**Figure S1: PRRSV-1 NSP1 $\alpha$  interacts with DNAJA3 and PIAS2.** Plate layout (A) for each yeast plate in (B). Yeast that had been co-transformed with combinations of the respective prey plasmid (termed “PAM protein” in (A)) and the bait plasmids NSP1 $\alpha$ , pGBKT7-53 and pGBKT7 (termed “NSP1”, “53” and “V” respectively in (A)) were plated on high stringency selection medium (SD agar -Trp, -Ade, -Leu and -His) containing X- $\alpha$ -Gal. Each streak corresponds to a different colony. The appearance of blue growth by yeast transformants expressing NSP1 $\alpha$  and the respective PAM protein (“PAM protein + NSP1” in (A)) suggested an interaction. However, the interaction was considered a possible false positive if blue growth was also observed for the control transformant (“PAM protein + V” in (A)). Yeast co-transformed with pGADT7-T and pGBKT7-53 together served as the positive control, and pGADT7-T and pGBKT7-LAM as the negative control.

A

| PAM + NSP1                                                                        | PAM + 53                                                                          | PAM + V                                                                           |                                                                                   |
|-----------------------------------------------------------------------------------|-----------------------------------------------------------------------------------|-----------------------------------------------------------------------------------|-----------------------------------------------------------------------------------|
|  |  |  | T + 53                                                                            |
|  |  |  |  |
|  |  |  |  |
|  |  |  | T + LAM                                                                           |
|  |  |  |                                                                                   |

B

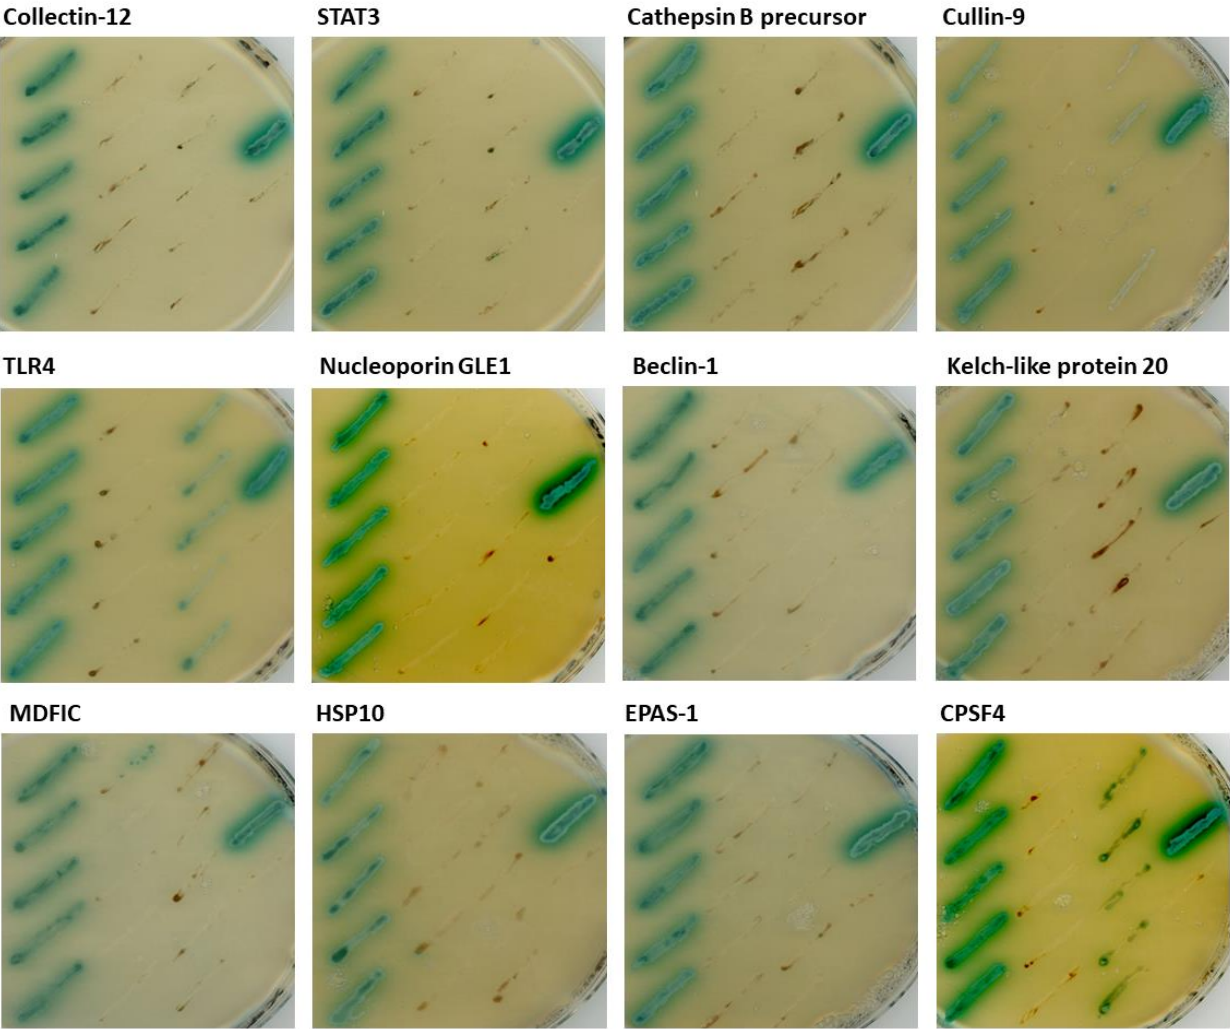

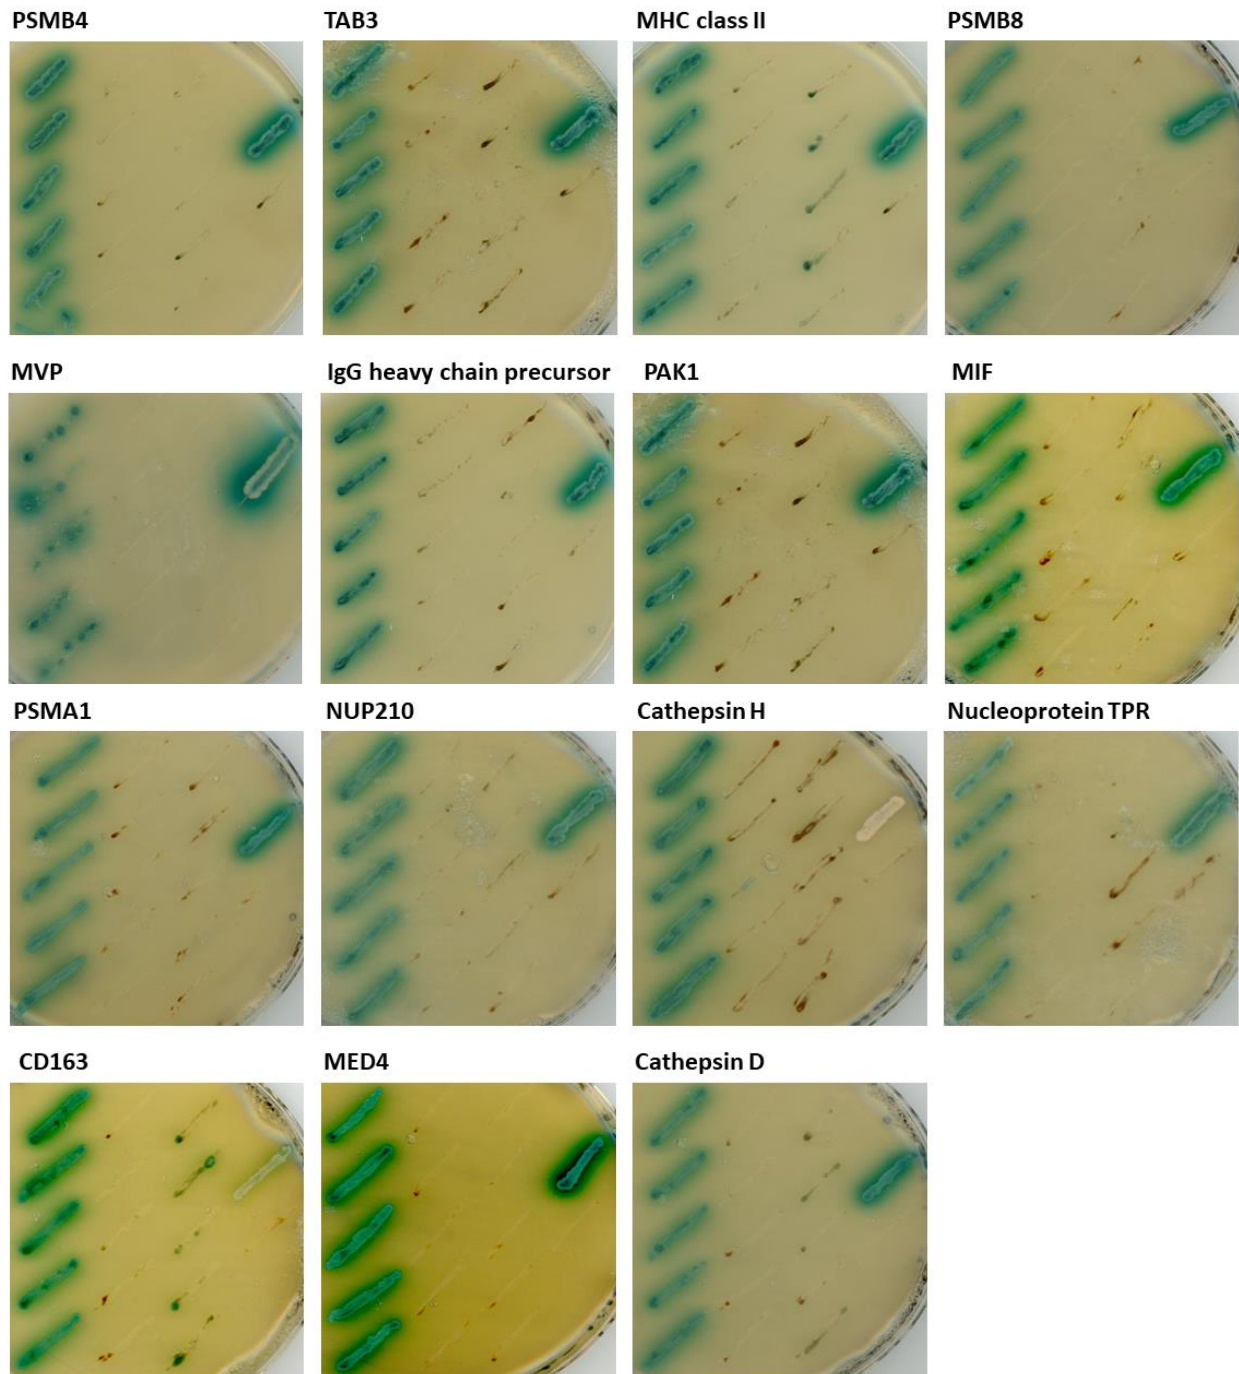

**Figure S2: Twenty-eight novel interactions between PRRSV-1 NSP1 $\beta$  and porcine proteins are genuine.** Plate layout (A) for each yeast plate in (B). Yeast that had been co-transformed with combinations of the respective prey plasmid (termed “PAM protein” in (A)) and the bait plasmids NSP1 $\beta$ , pGBKT7-53 and pGBKT7 (termed “NSP1”, “53” and “V” respectively in (A)) were plated on high stringency selection medium (SD agar -Trp, -Ade, -Leu and -His) containing X- $\alpha$ -Gal. Each streak corresponds to a different colony. The appearance of blue growth by yeast transformants expressing NSP1 $\beta$  and the respective PAM protein (“PAM protein + NSP1” in (A)) suggested an interaction. However, the interaction was considered a possible false positive if blue growth was also observed for the control transformants (“PAM protein + 53” and “PAM protein + V” in (A)). Yeast co-transformed with pGADT7-T and pGBKT7-53 together served as the positive control, and pGADT7-T and pGBKT7-LAM as the negative control.

**A**

|         |                                                                                   | PAM +<br>V                                                                        | PAM +<br>53                                                                       | PAM +<br>SU1-Bel<br>NSP1                                                          | PAM +<br>215-06<br>NSP1                                                           |
|---------|-----------------------------------------------------------------------------------|-----------------------------------------------------------------------------------|-----------------------------------------------------------------------------------|-----------------------------------------------------------------------------------|-----------------------------------------------------------------------------------|
| T + 53  |  |  |  |  |  |
| T + LAM |  |  |  |  |  |

**B**

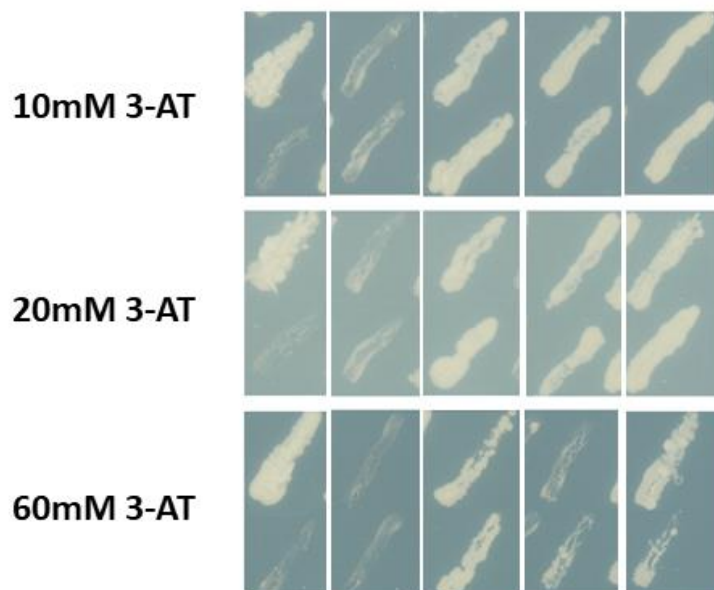

**Figure S3: PIAS1 interacts with NSP1 $\alpha$  from PRRSV-1 215-06 and SU1-Bel strains on agar containing 60 mM 3-AT.** Plate layout (A) for each yeast plate in (B). Yeast that had been co-transformed with combinations of the PIAS1 prey plasmid (termed “PAM protein” in (A)) and the bait plasmids NSP1 $\alpha$ , pGBKT7-53 and pGBKT7 (termed “NSP1”, “53” and “V” respectively in (A)) were plated on high stringency selection medium (SD agar -Trp, -Ade, -Leu and -His) containing either 10 mM, 20 mM or 60 mM 3-AT (B). Each streak corresponds to a different colony. The appearance of growth by yeast transformants expressing NSP1 $\alpha$  and the respective PAM protein (“PAM protein + NSP1” in (A)) suggested an interaction; the higher the 3-AT concentration of the SD agar the yeast grew on, the stronger the interaction. Yeast co-transformed with pGADT7-T and pGBKT7-53 together served as the positive control, and pGADT7-T and pGBKT7-LAM as the negative control.

A

| PAM + NSP1                                                                        | PAM + 53                                                                          | PAM + V                                                                           |                                                                                   |
|-----------------------------------------------------------------------------------|-----------------------------------------------------------------------------------|-----------------------------------------------------------------------------------|-----------------------------------------------------------------------------------|
|  |  |  | T + 53                                                                            |
|  |  |  |  |
|  |  |  |  |
|  |  |  | T + LAM                                                                           |
|  |  |  |                                                                                   |

B

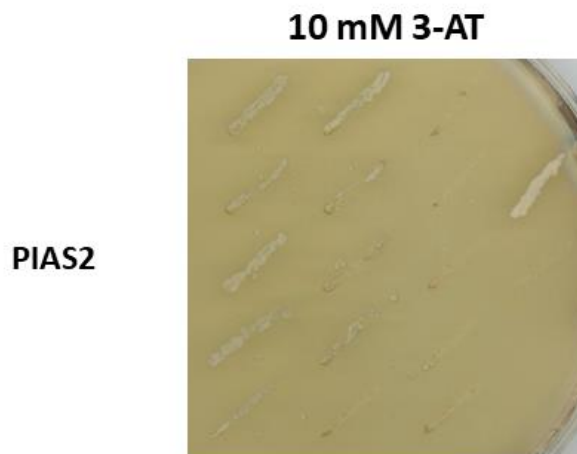

**Figure S4: PIAS2 interacts with PRRSV-1 NSP1 $\alpha$  on agar containing 10 mM 3-AT.** Plate layout (A) for yeast plate in (B). Yeast that had been co-transformed with combinations of the respective prey plasmid (termed “PAM protein” in (A)) and the bait plasmids NSP1 $\alpha$ , pGBKT7-53 and pGBKT7 (termed “NSP1”, “53” and “V” respectively in (A)) were streaked on high stringency selection medium (SD agar -Trp, -Ade, -Leu and -His) containing either 10 mM, 20 mM or 60 mM 3-AT. Each streak corresponds to a different colony. The appearance of growth by yeast transformants expressing NSP1 $\alpha$  and the respective PAM protein (“PAM protein + NSP1” in (A)) suggested an interaction; the higher the 3-AT concentration of the SD agar the yeast grew on, the stronger the interaction. Yeast co-transformed with pGADT7-T and pGBKT7-53 together served as the positive control, and pGADT7-T and pGBKT7-LAM as the negative control.

A

| PAM + NSP1                                                                        | PAM + 53                                                                          | PAM + V                                                                           |                                                                                   |
|-----------------------------------------------------------------------------------|-----------------------------------------------------------------------------------|-----------------------------------------------------------------------------------|-----------------------------------------------------------------------------------|
|  |  |  |                                                                                   |
|  |  |  | T + 53                                                                            |
|  |  |  |  |
|  |  |  |  |
|  |  |  | T + LAM                                                                           |

B

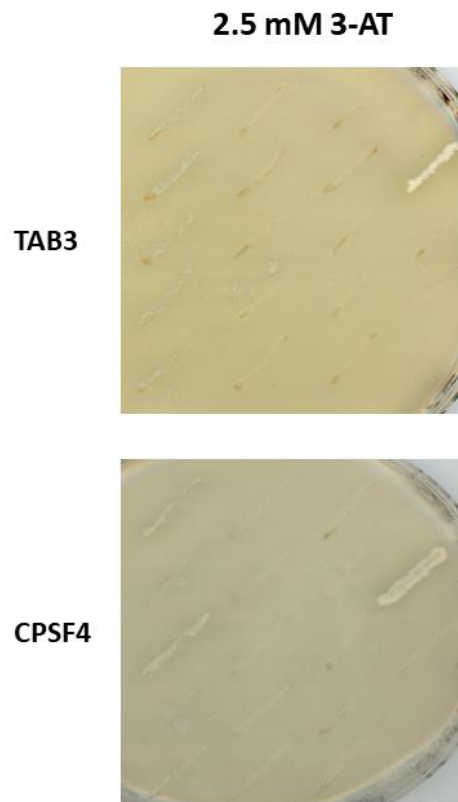

**Figure S5: TAB3 and CPSF4 interact with PRRSV-1 NSP1 $\beta$  on agar containing 2.5 mM 3-AT.** Plate layout (A) for each yeast plate in (B). Yeast that had been co-transformed with combinations of the respective prey plasmid (termed “PAM protein” in (A)) and the bait plasmids NSP1 $\beta$ , pGBKT7-53 and pGBKT7 (termed “NSP1”, “53” and “V” respectively in (A)) were plated on high stringency selection medium (SD agar -Trp, -Ade, -Leu and -His) containing either 2.5 mM or 5 mM 3-AT. Each streak corresponds to a different colony. The appearance of growth by yeast transformants expressing NSP1 $\beta$  and the respective PAM protein (“PAM protein + NSP1” in (A)) suggested an interaction; the higher the 3-AT concentration of the SD agar the yeast grew on, the stronger the interaction. Yeast co-transformed with pGADT7-T and pGBKT7-53 together served as the positive control, and pGADT7-T and pGBKT7-LAM as the negative control.
